# Supplementary material for: Evaluation of the Hemostatic Effect of an Innovative Tissue Adhesive during Extraction Therapy under Rivaroxaban in a Rodent Model
Source: MDPI journal article supplement (doi:10.3390/jfb14070333), 2023-06-22
Supplement: s1 [file s1]

Table S1. Material and Machines.

|                                  | Manufacturer               | Country     | LOT/Model Number |
|----------------------------------|----------------------------|-------------|------------------|
| Test tubes sodium citrate (3.2%) | Sarstedt                   | Germany     | 41.1506.002      |
| Hemosil Readiplastin             | Werfen                     | Germany     | 00020301400      |
| Thrombin reagent                 | Werfen                     | Germany     | 0009758515       |
| HemosIL Liquid Anti-Xa Assay     | Werfen                     | Germany     | 0020302601       |
| ACL-TOP550                       | Werfen                     | Germany     | 00000280045      |
| OPMI pico f170                   | Carl Zeiss                 | Germany     | 01SYSD9          |
| ROEKO Gelatamp                   | Coltene                    | Switzerland | 60022234         |
| Vicryl 6-0                       | Ethicon Inc.               | USA         | 1705202          |
| VIVO adhesive                    | Adhesys Medical GmbH       | Germany     | N.A.             |
| 4% Formalin                      | Otto Fischar GmbH & Co. KG | Germany     | 27279            |
| Hematoxylin and eosin            | Carl Roth                  | Germany     | 9194.2           |

N.A. not applicable
